# Supplementary material
Source: PubMed Central journal article supplement (PMC5289832)
Supplement: 503FileS1.pdf [file 503FileS1.pdf]

# **File S1**

**Modeling strategy for repeat  
transmission frequency comparisons  
accounting for paternal CAG repeat  
differences**

To control for potential confounding effects of paternal CAG size on the frequency of unstable transmissions between distinct strains and/or lines, we compared actual transmission frequencies in test datasets with expected frequencies derived from simulated data based on a reference dataset.

| Reference dataset          | dataset N | Test dataset(s)            | dataset N | Notes                        |
|----------------------------|-----------|----------------------------|-----------|------------------------------|
| 50% B6J (CHGR)             | 354       | 50% B6J (CHGR)             | 353       | validation                   |
| B6J (CHGR)                 | 707       | 129 (CHGR)                 | 213       | strain comparison            |
|                            |           | CD1 (CHGR)                 | 439       |                              |
|                            |           | FVB (CHGR)                 | 180       |                              |
|                            |           | DBA (CHGR)                 | 64        |                              |
|                            |           | B6N (CHGR)                 | 226       |                              |
|                            |           | B6J (CHGR)                 | 707       |                              |
| CD1 <sup>neo-</sup> (CHGR) | 439       | CD1 <sup>neo+</sup> (CHGR) | 152       | neo cassette comparison (I)  |
| Q175 <sup>neo+</sup> (JAX) | 9172      | Q175 <sup>neo-</sup> (JAX) | 256       | neo cassette comparison (II) |

## Notes

Reference datasets always possessed a higher total number of transmissions in order to build optimal frequency vs. paternal CAG models.

Figures in this supplementary file are representations of B6J (CHGR) as the reference dataset and CD1 (CHGR) as the test dataset.

Step 1. Linear weighted trend lines for percent of events (expansions, contractions and stable transmissions) per paternal CAG size were calculated for the reference dataset (e. g. CHGR B6J strain).

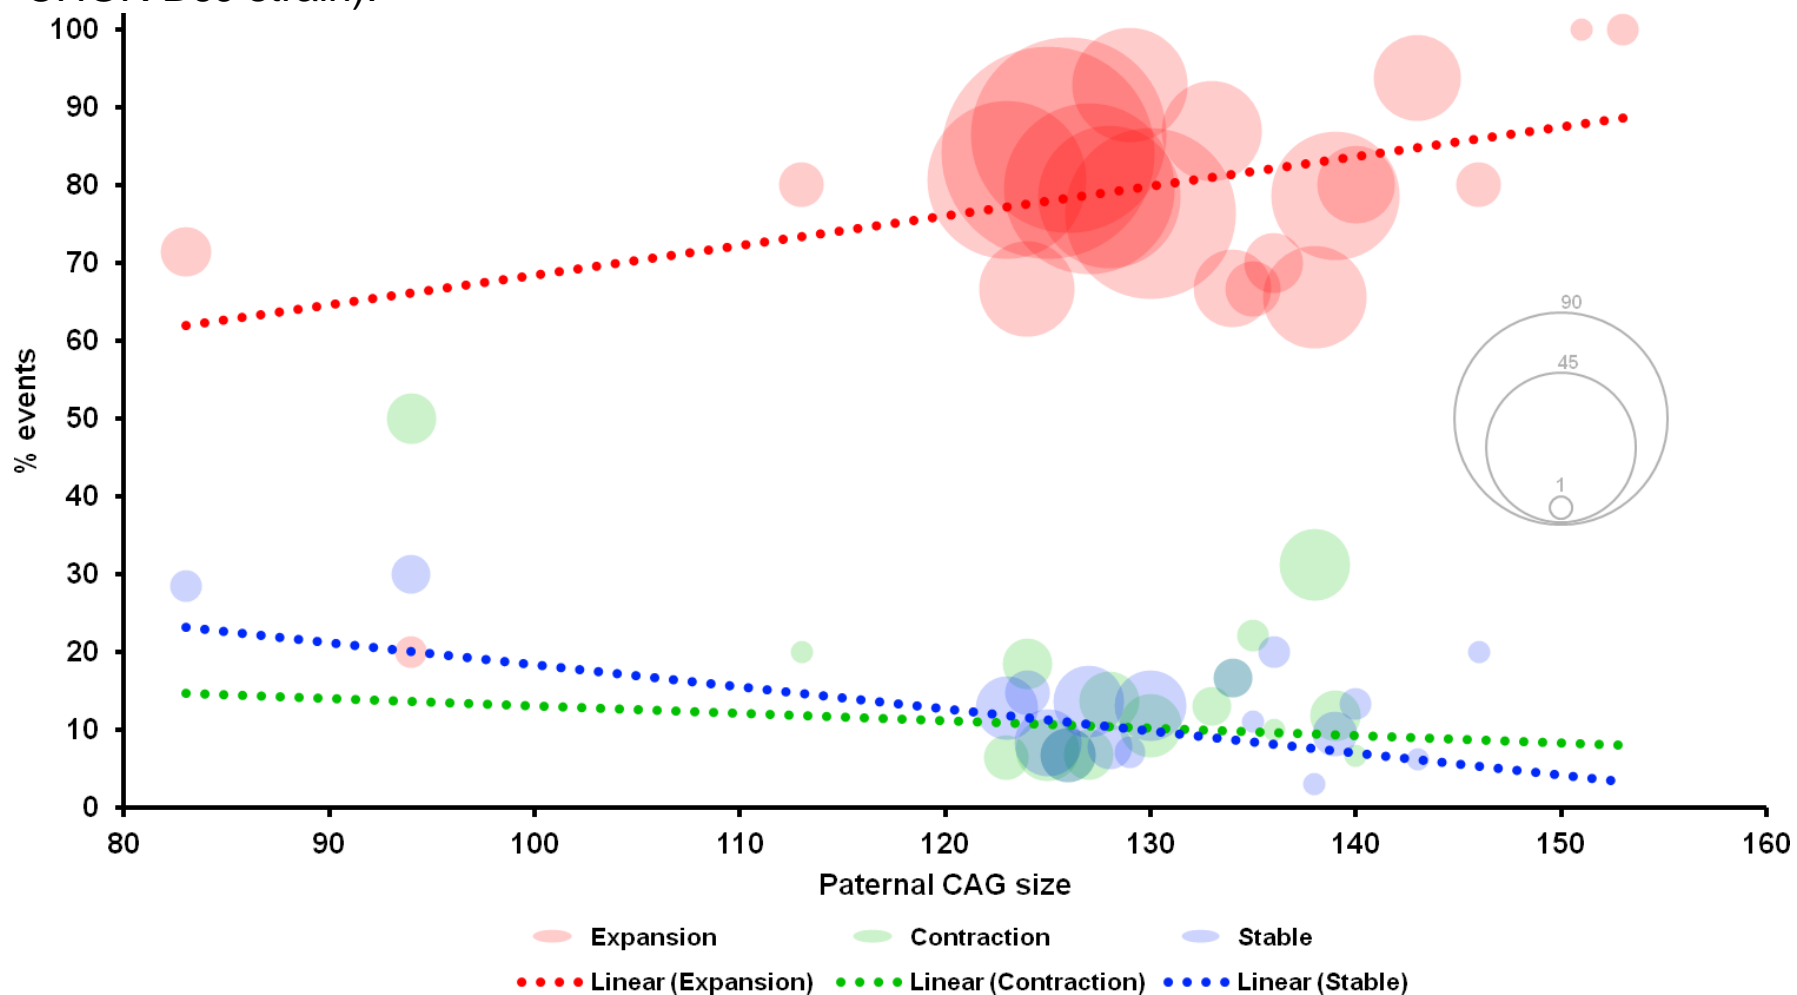

Events with null frequency (N=0) are considered for trend line weighing but are not depicted as bubbles.

Step 2. Based on the weighted trend lines we determined frequency intervals for each event over the range of CAG sizes in the reference dataset.

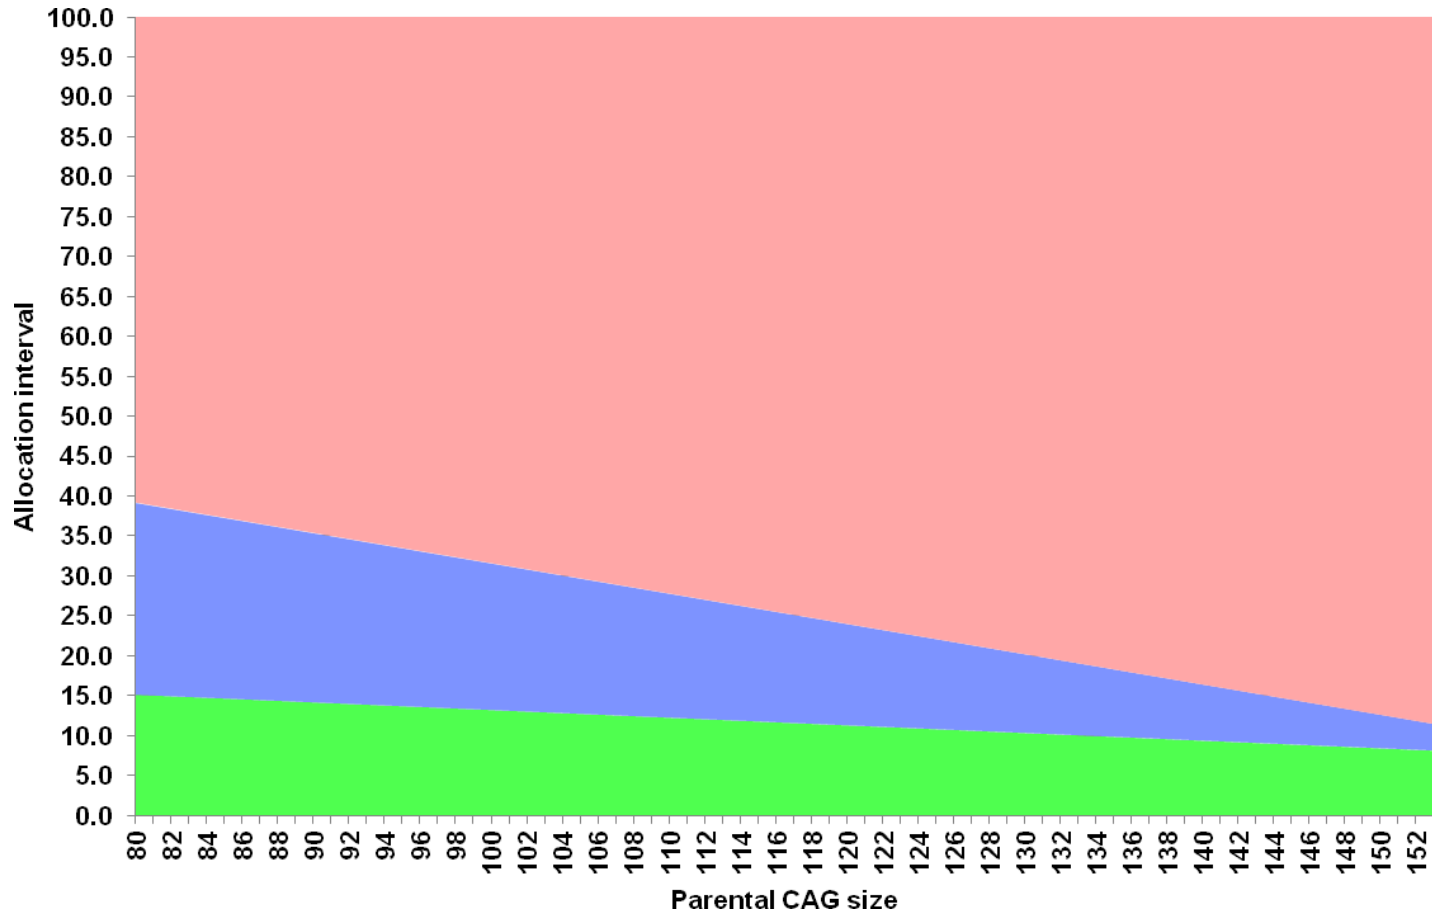

Expansion – red; Stable – blue; Contraction – green

Paternal CAG repeat size distribution in the CHGR CD1 test dataset.

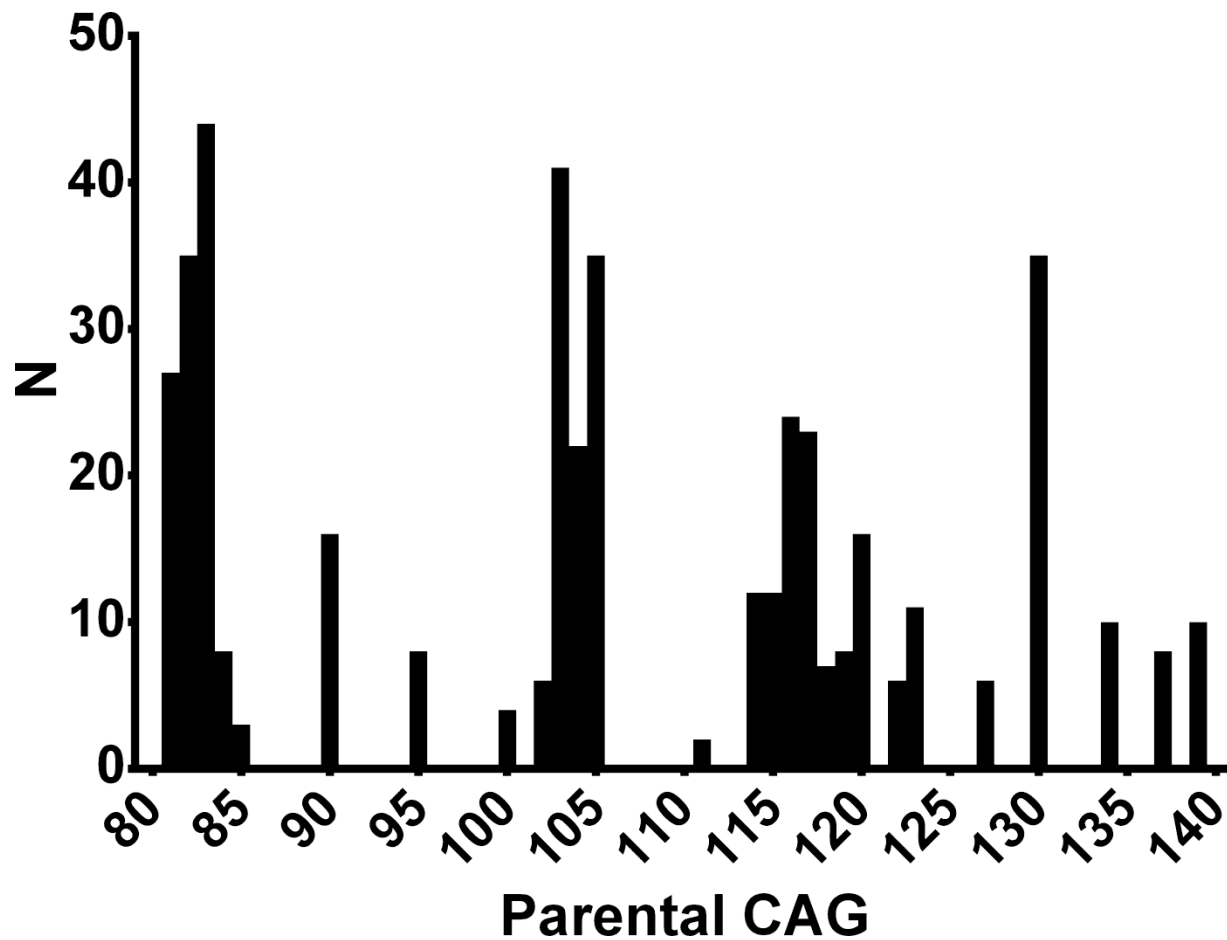

$N_{\text{total}} = 439$

Step 3. A random number between 0.0 and 100.0 was generated for each transmission and, based on the paternal CAG length, was allocated to contraction / expansion / stable transmission according to the frequency intervals defined by the reference dataset.

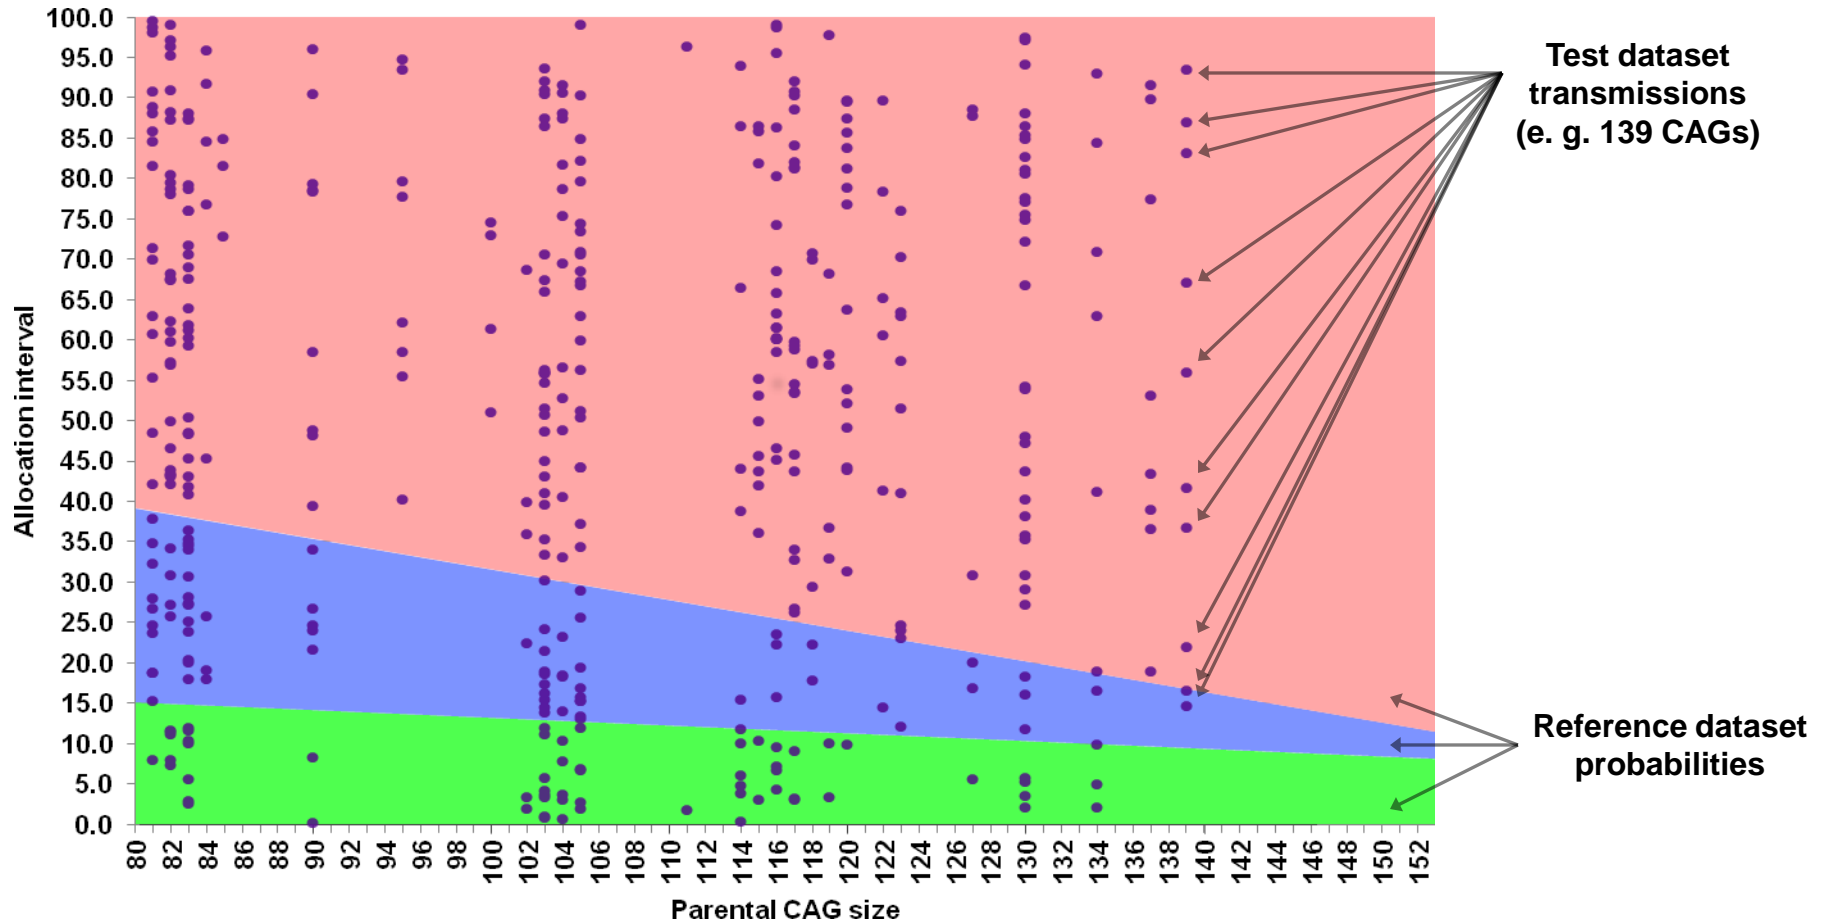

iteration 1

Overall distribution

**%Expansion** 68.8

**%Stable** 17.5

**%Contraction** 13.7

Each dot represents a unique transmission (N=439)

Step 4. 1,000 iterations of the random number generation and event allocation were performed.

iteration 2

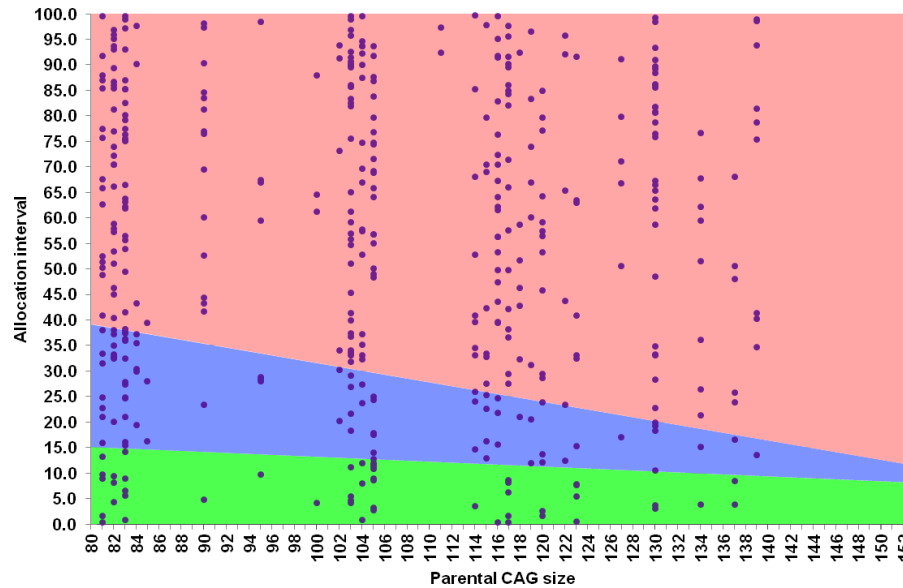

...

...

iteration 1000

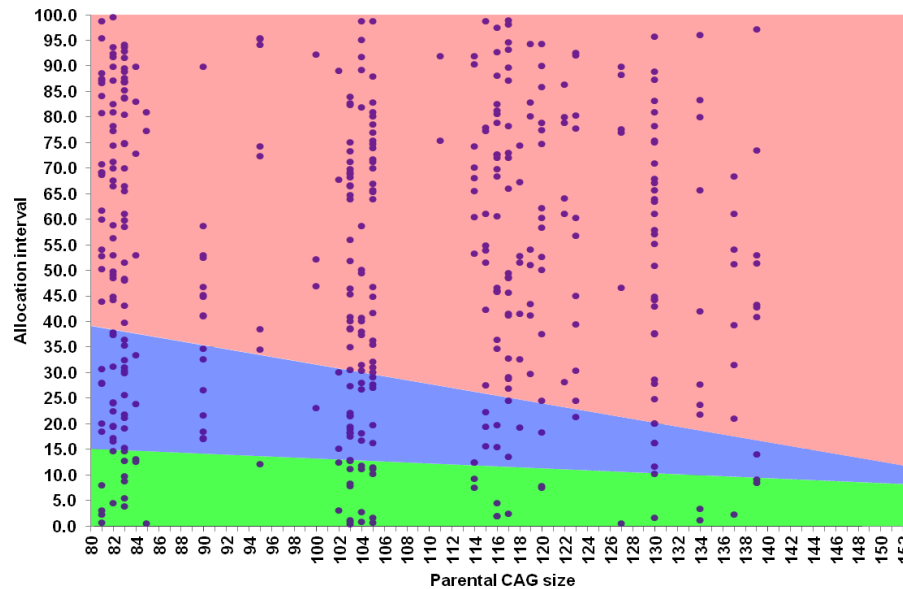

Step 5. The average dataset was determined and characterized.

| Line | Event        | Mean | St. dev. | 95% CI |
|------|--------------|------|----------|--------|
| CD1  | %Stable      | 16.8 | 1.8      | 0.11   |
|      | %Contraction | 12.7 | 1.6      | 0.10   |
|      | %Expansion   | 70.5 | 2.2      | 0.13   |

Average dataset for the CD1 strain

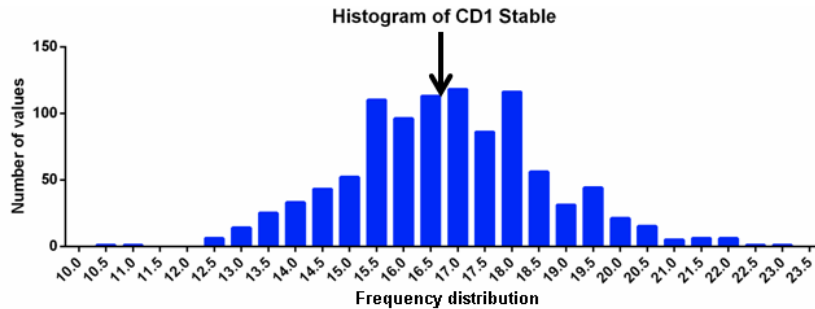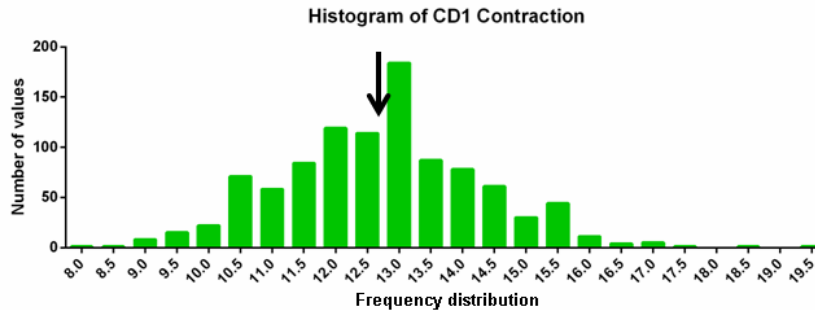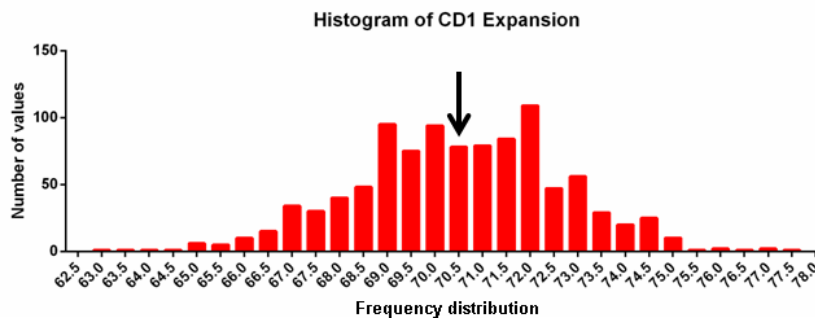

Frequency distributions (binned at 0.5% intervals for figure simplification) for stable transmissions, contractions and expansions across the 1,000 simulated datasets. Arrows indicate the value of the average dataset.



Step 6. Statistical analyses were performed to determine significant differences between observed and expected frequencies, as detailed in the Methods section. Validation and results are present in Figure S2, Figure 6A, Figure 7A and C.

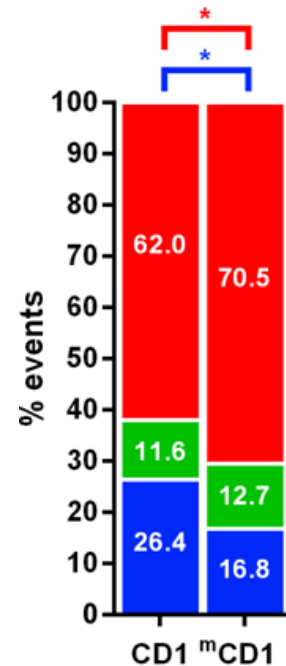

Comparison of expansions, contractions and stable transmissions frequencies in the CD1 strain. Observed frequencies (left) and modeled(<sup>m</sup>)/expected frequencies (right).

(Partial reproduction of Figure 6A)

## Trend lines determined for the reference datasets:

### Validation [50% B6J (CHGR), N=354]

$$\% \text{Expansions} = 0.214 \times \text{Parental CAG} + 52.929$$

$$\% \text{Contractions} = 0.053 \times \text{Parental CAG} + 3.095$$

$$\% \text{Stable} = -0.267 \times \text{Parental CAG} + 43.976$$

### Strain comparison [B6J (CHGR)]

$$\% \text{Expansions} = 0.380 \times \text{Parental CAG} + 30.423$$

$$\% \text{Contractions} = -0.096 \times \text{Parental CAG} + 22.77$$

$$\% \text{Stable} = -0.284 \times \text{Parental CAG} + 46.807$$

### neo cassette comparison (I) [CD1<sup>neo-</sup> (CHGR)]

$$\% \text{Expansions} = 0.596 \times \text{Parental CAG} - 0.998$$

$$\% \text{Contractions} = -0.156 \times \text{Parental CAG} + 28.08$$

$$\% \text{Stable} = -0.44 \times \text{Parental CAG} + 72.918$$

### neo cassette comparison (II) [Q175<sup>neo+</sup> (JAX)]

$$\% \text{Expansions} = -0.581 \times \text{Parental CAG} + 193.207$$

$$\% \text{Contractions} = 0.524 \times \text{Parental CAG} - 88.907$$

$$\% \text{Stable} = 0.057 \times \text{Parental CAG} - 4.3$$
