# Supplementary material
Source: PubMed Central journal article supplement (PMC5289832)
Supplement: 503FileS2.pdf [file 503FileS2.pdf]

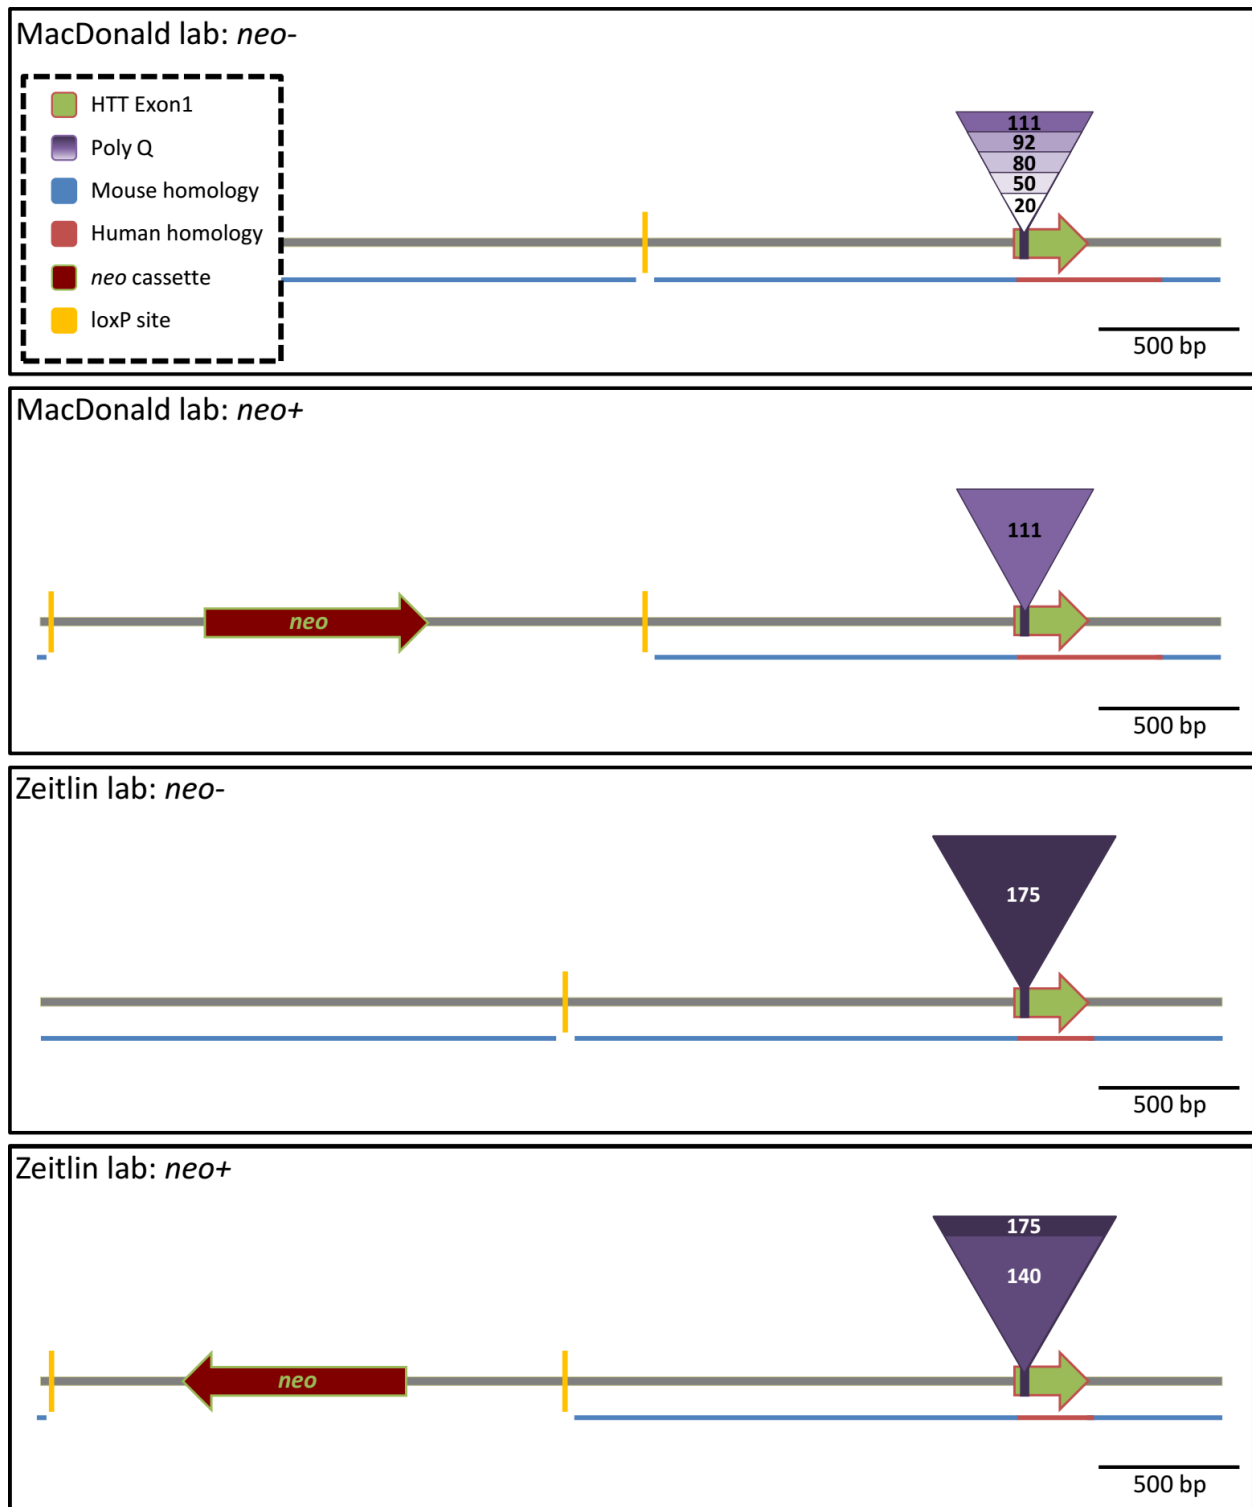

**Figure S1. Schematic representation of the Htt locus representing the different lines used in this study as well as the relative location and direction of the neo cassette and other locus elements.**

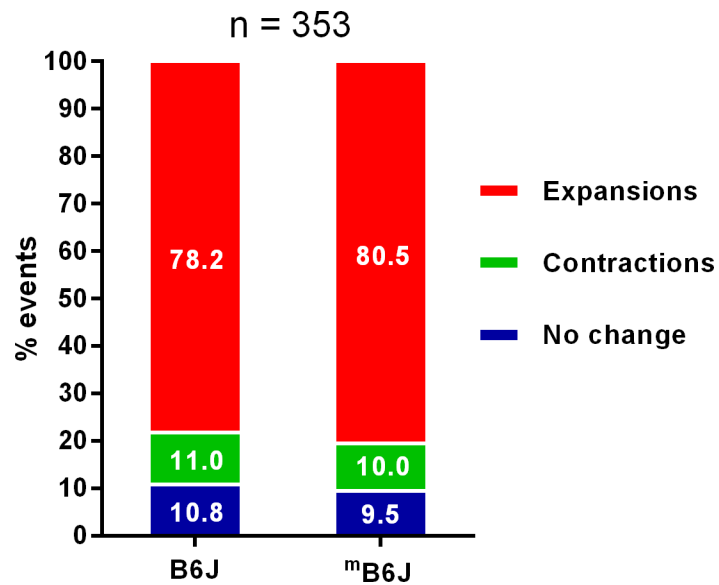

**Figure S2. Validation of the frequency modeling methodology for comparison of intergenerational instability across different datasets.** Left bar represents the frequencies observed within 50% of the B6J dataset (n=353), while the right bar represents the same dataset with frequencies modeled based on the remaining 50% (n=354) which was used as the reference dataset. No significant differences were observed.

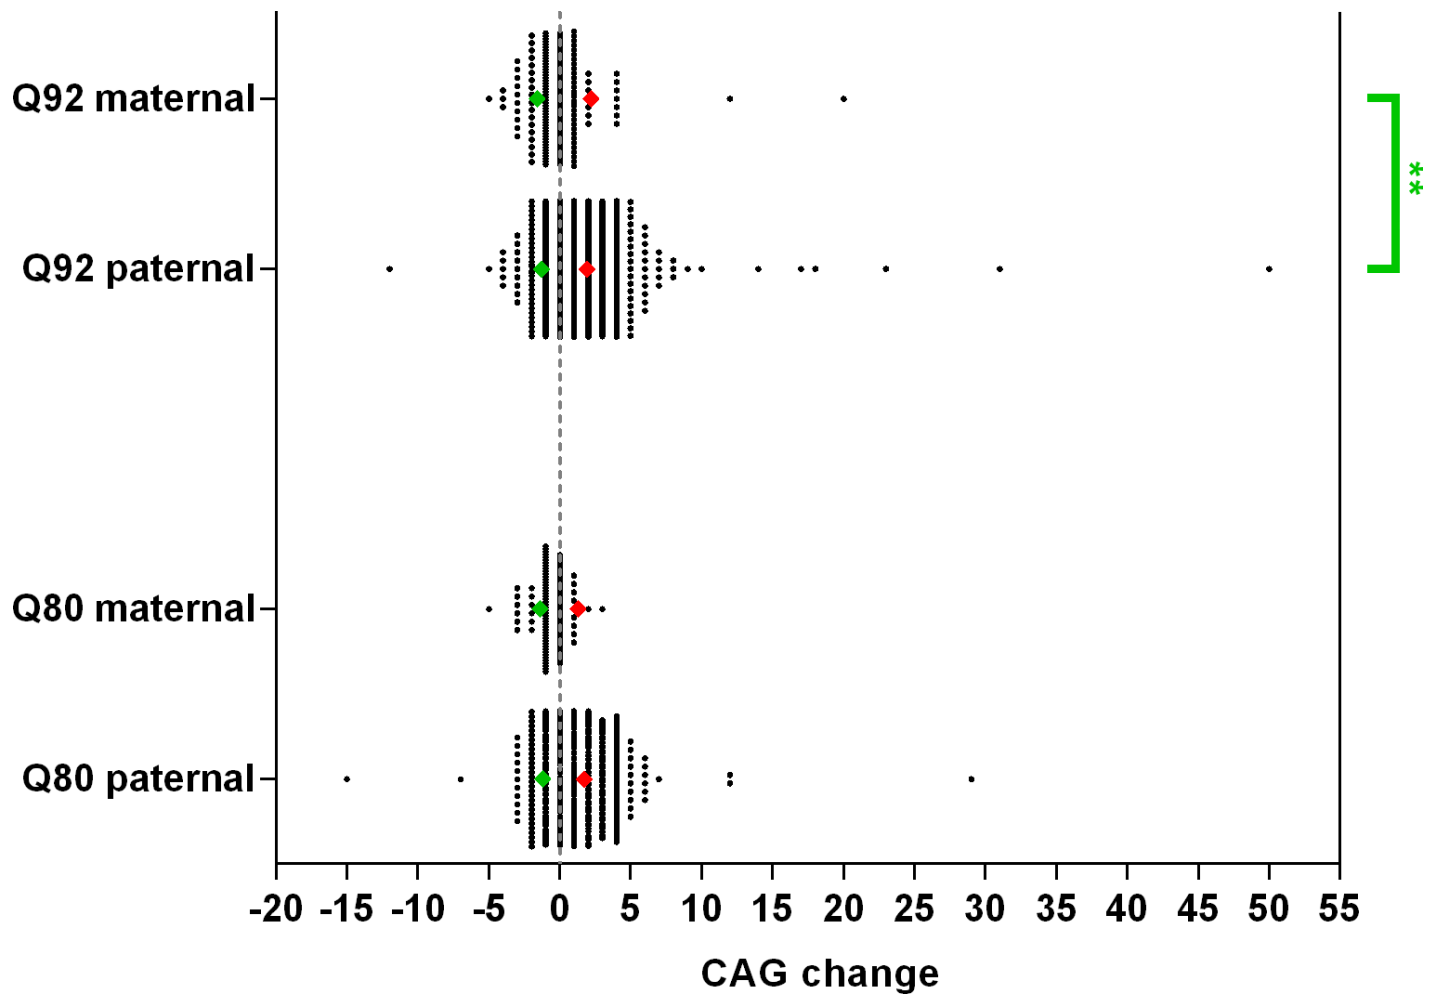

**Figure S3. Magnitude of changes in paternal and maternal transmissions ( $Htt^{Q80}$  and  $Htt^{Q92}$ ) in JAX's transmission data.** Representation of CAG change for all maternal and paternal transmissions observed (dotted, black), in the  $Htt^{Q80}$  and  $Htt^{Q92}$  lines, as well as mean expansion (diamonds, red) and mean contraction (diamonds, green) values (see also Table 2 and Table 3).

\*\*p<0.01

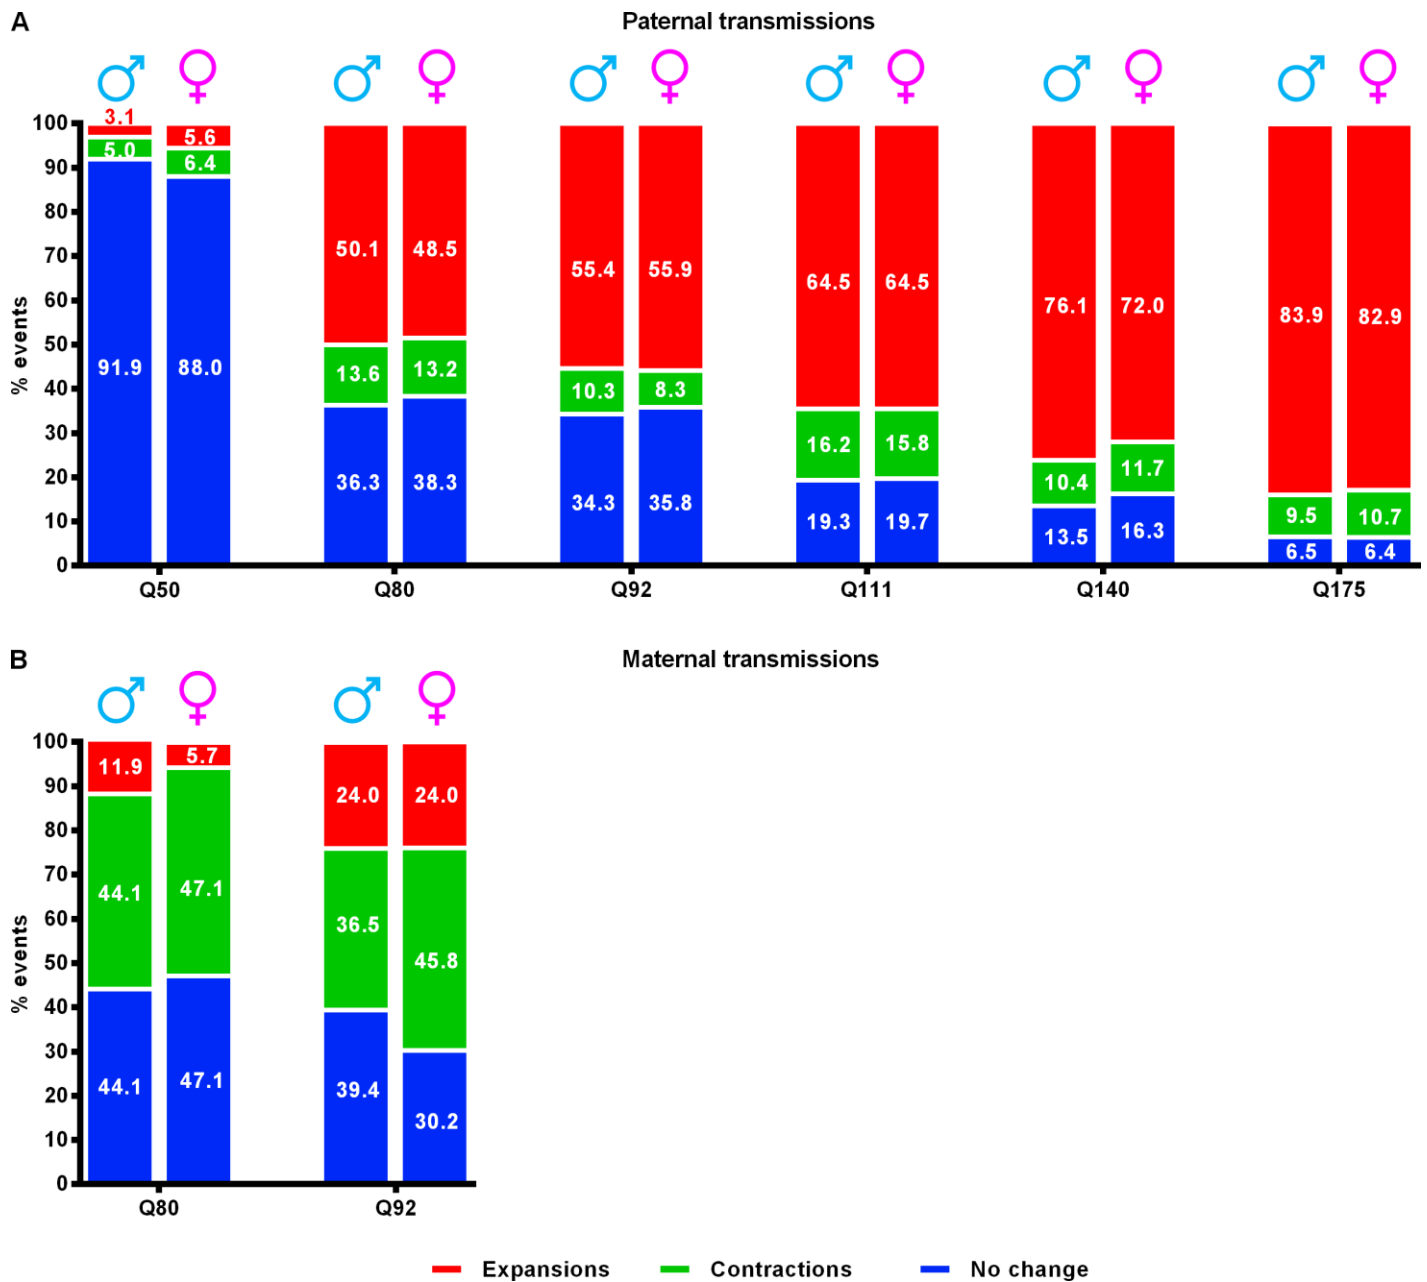

**Figure S4. Relative frequency of stable and unstable transmissions by offspring sex in the JAX *Htt* CAG knock-in dataset.** Breakdown of transmission frequency by expansions (red), contractions (green) and stable transmissions (blue) separated by offspring sex among paternal (A) and maternal (B) transmissions.

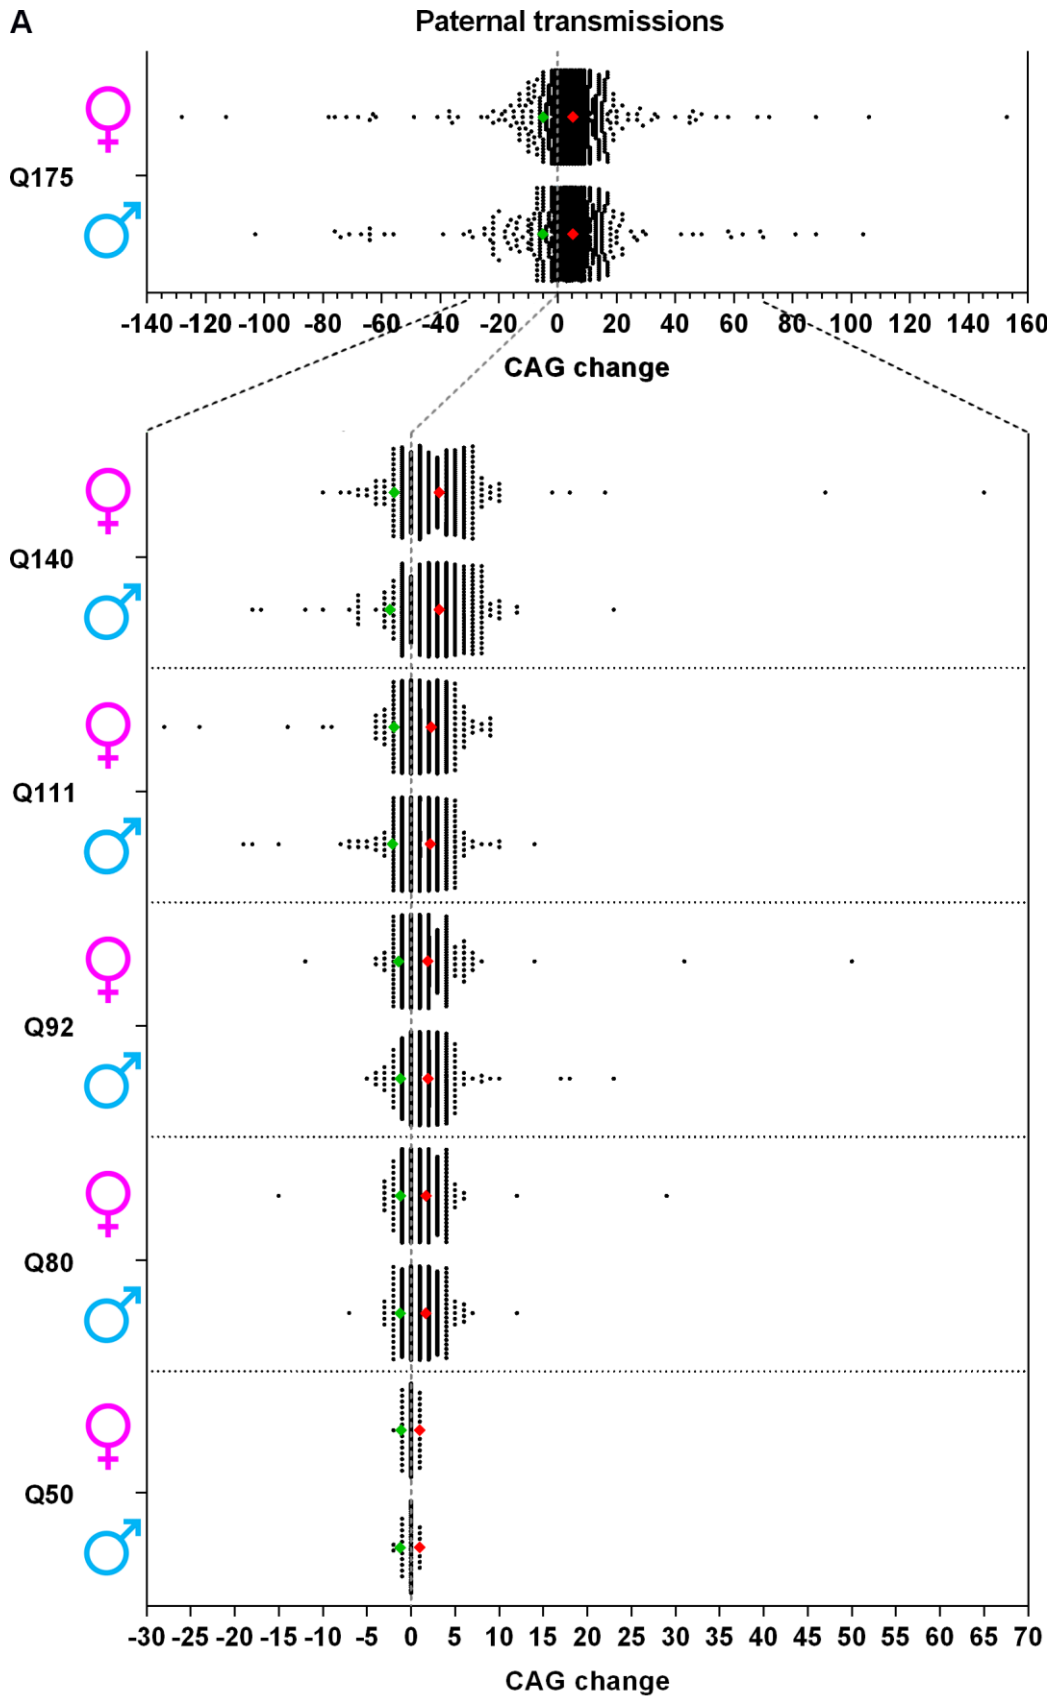

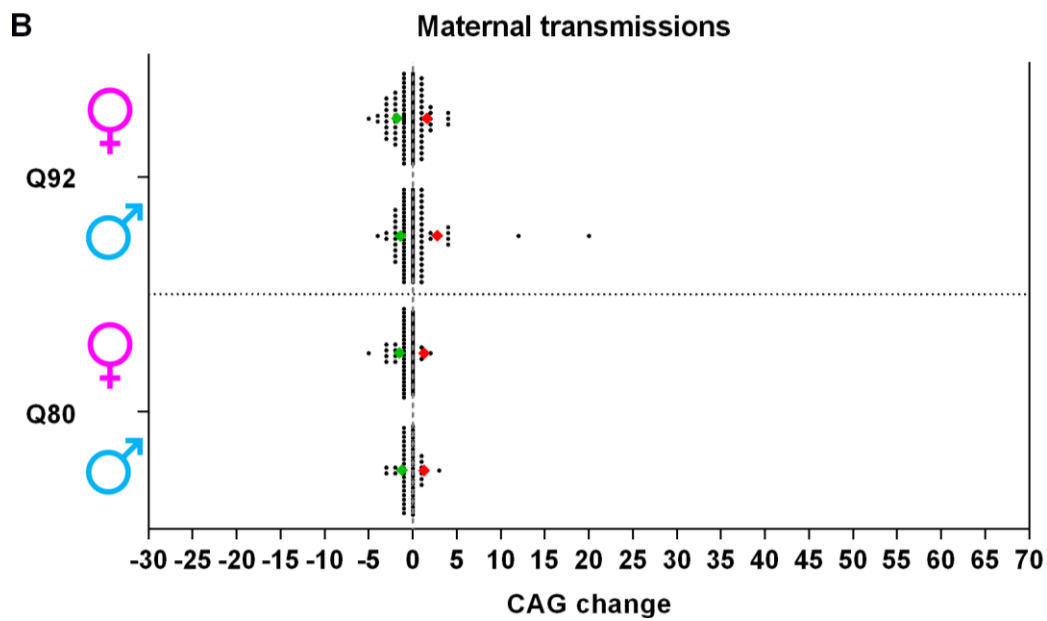

**Figure S5. Magnitude of changes segregated by offspring sex in paternal and maternal transmissions in JAX's transmission data.** Representation of CAG changes for all paternal (A) and maternal (B) transmissions observed (dotted, black) in the available lines, as well as mean expansions (diamonds, red) and mean contractions (diamonds, green).

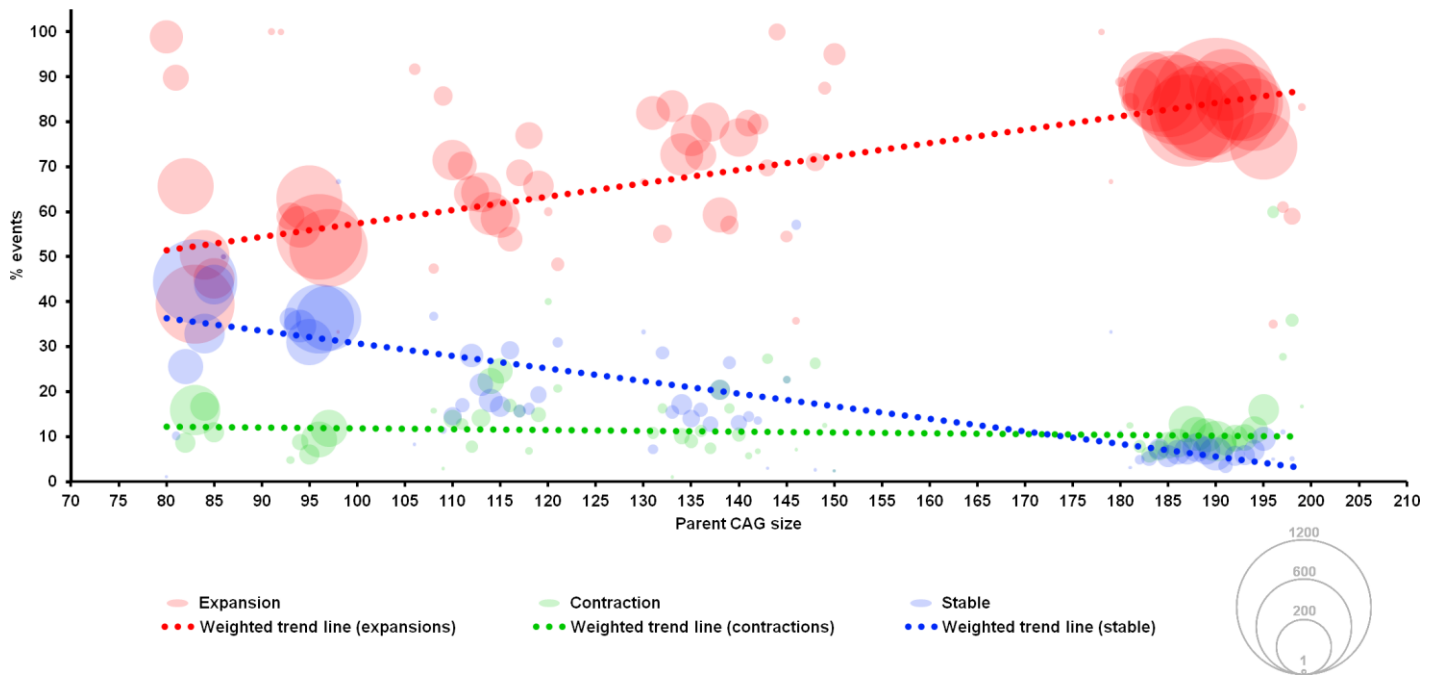

**Figure S6. Relative frequency of stable and unstable (expansions, contractions) transmissions by paternal CAG size in JAX's dataset.** Breakdown of transmission frequency by expansions, contractions and stable transmissions using paternal CAG size as a continuous variable. Trend lines weighed by the total number of observed transmissions for each parental CAG length are represented as dotted lines. Bubble size is proportional to the total number of observed events. Events with null frequency (N=0) are considered for trend line weighing but are not depicted as bubbles.

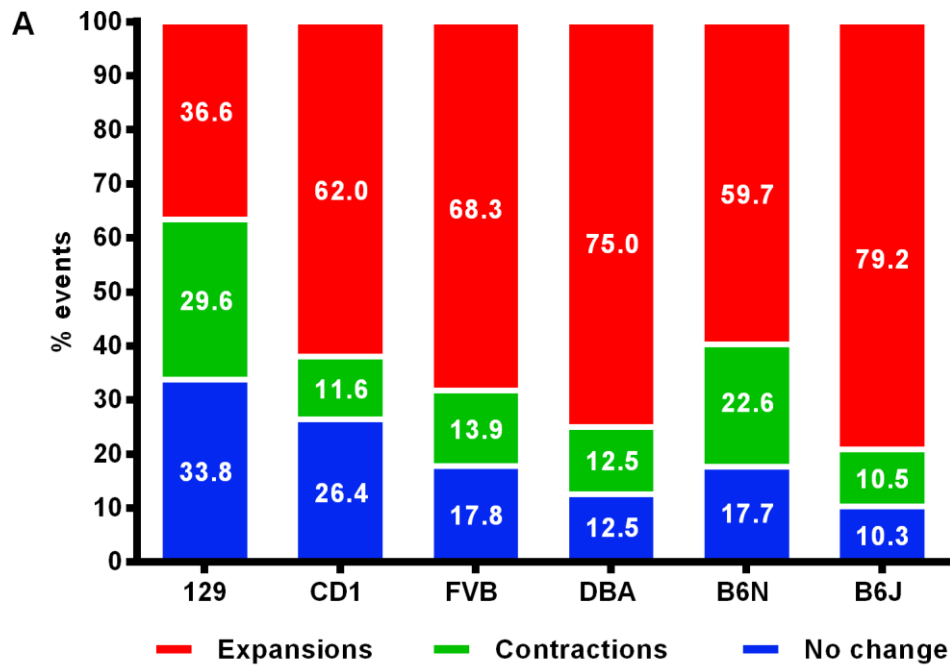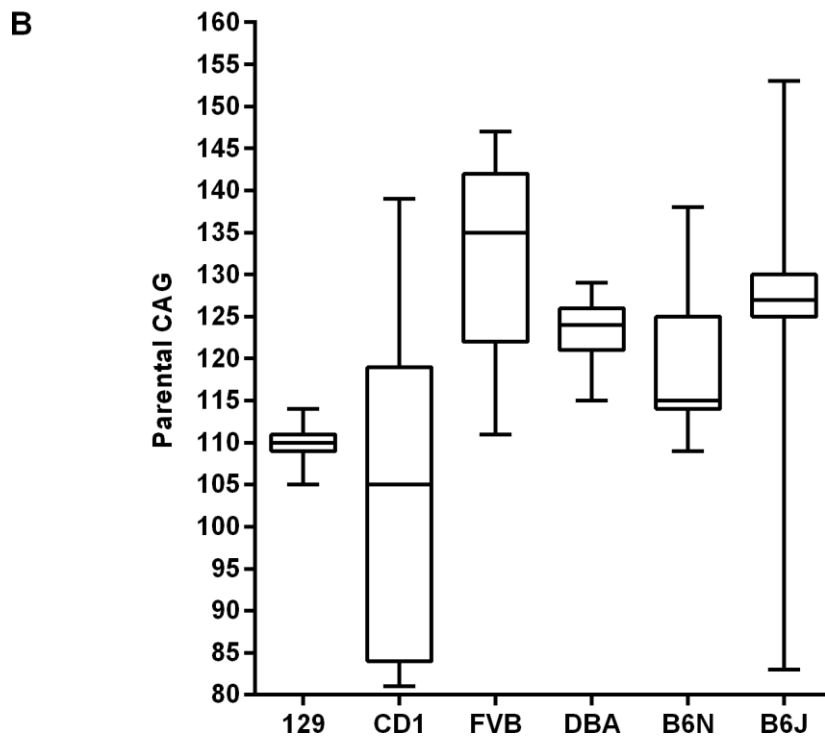

**Figure S7. Frequency of changes and paternal CAG sizes across the six genetic backgrounds.**

(A) Frequency of expansions, contractions and stable transmissions across different strains in the CHGR breeding dataset (B) Parental CAG range among the six strains (boxes encompass 50% of total transmissions, whiskers represent minimum to maximum size).



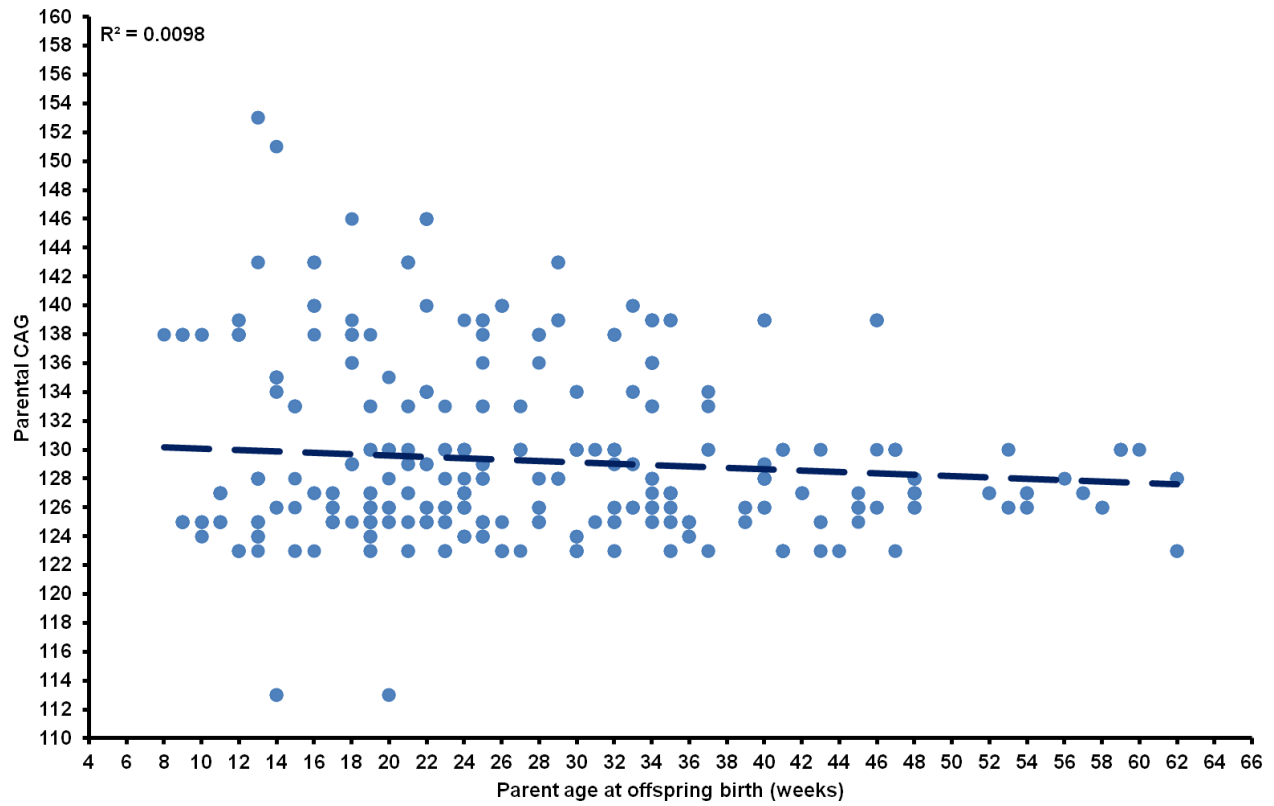

**Figure S8.** Distribution of parental CAG repeat size across paternal age at birth in the B6J.*Htt*<sup>Q111</sup> mice (113-153 CAGs; N=690 transmissions) in CHGR's breeding dataset.

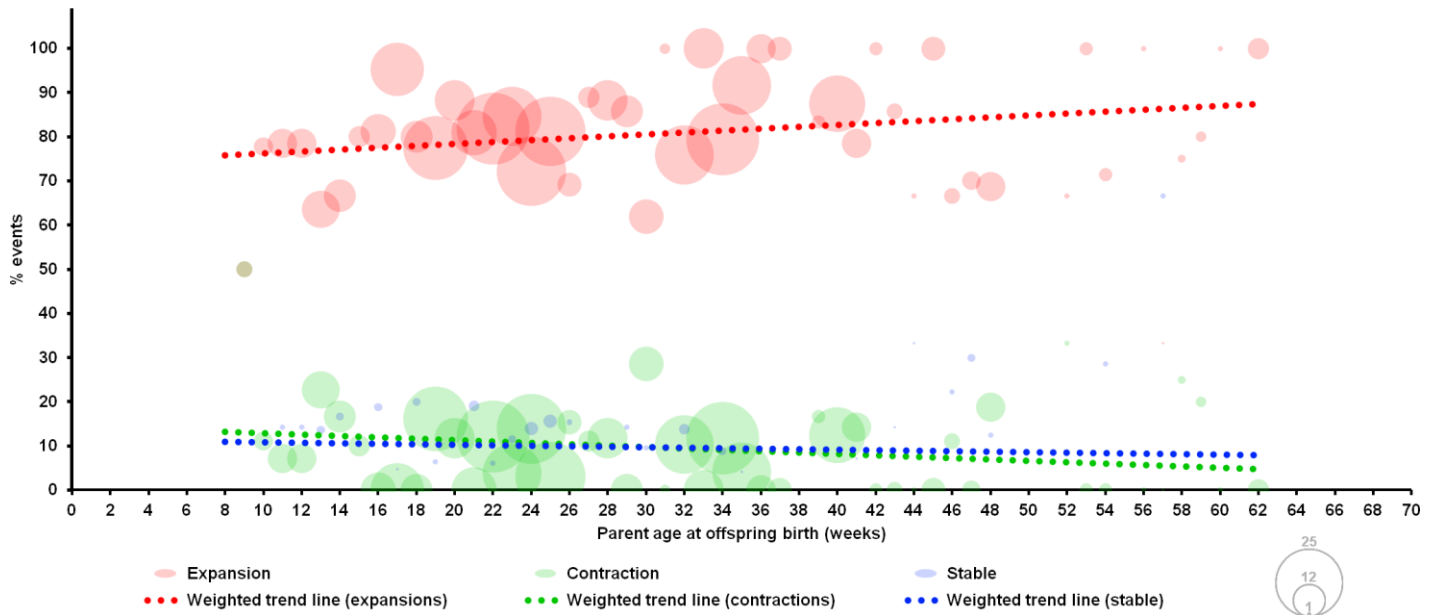

**Figure S9. Frequency of changes by paternal age at offspring birth (B6J background, CHGR dataset).** Trend lines weighed by the total number of observed transmissions for each parental age are represented as dotted lines. Bubble size is proportional to the total number of observed events. Events with null frequency (N=0) are considered for trend line weighing but are not depicted as bubbles.

A

## Paternal transmissions

| Line | to male offspring |            |              |      |      |             |      |      |       | to female offspring |              |      |      |             |      |      |
|------|-------------------|------------|--------------|------|------|-------------|------|------|-------|---------------------|--------------|------|------|-------------|------|------|
|      | Total             | Stable     | Contractions |      |      | Expansions  |      |      | Total | Stable              | Contractions |      |      | Expansions  |      |      |
|      | N                 | N (%)      | N (%)        | Max. | Mean | N (%)       | Max. | Mean | N     | N (%)               | N (%)        | Max. | Mean | N (%)       | Max. | Mean |
| Q50  | 260               | 239 (91.9) | 13 (5.0)     | 2    | 1.2  | 8 (3.1)     | 1    | 1.0  | 251   | 221 (88.0)          | 16 (6.4)     | 2    | 1.1  | 14 (5.6)    | 1    | 1.0  |
| Q80  | 1184              | 430 (36.3) | 141 (13.6)   | 7    | 1.2  | 593 (50.1)  | 12   | 1.7  | 1281  | 491 (38.3)          | 169 (13.2)   | 15   | 1.2  | 621 (48.5)  | 29   | 1.7  |
| Q92  | 1427              | 489 (34.3) | 147 (10.3)   | 5    | 1.2  | 791 (55.4)  | 23   | 1.9  | 1456  | 521 (35.8)          | 121 (8.3)    | 12   | 1.4  | 814 (55.9)  | 50   | 1.9  |
| Q111 | 772               | 149 (19.3) | 125 (16.2)   | 19   | 2.1  | 498 (64.5)  | 14   | 2.2  | 778   | 153 (19.7)          | 123 (15.8)   | 28   | 1.9  | 502 (64.5)  | 9    | 2.3  |
| Q140 | 779               | 105 (13.5) | 81 (10.4)    | 18   | 2.4  | 593 (76.1)  | 23   | 3.2  | 779   | 127 (16.3)          | 91 (11.7)    | 10   | 1.9  | 561 (72.0)  | 65   | 3.2  |
| Q175 | 4719              | 309 (6.5)  | 450 (9.5)    | 103  | 5.1  | 3960 (83.9) | 104  | 5.2  | 4453  | 283 (6.4)           | 477 (10.7)   | 128  | 5.0  | 3693 (82.9) | 153  | 5.2  |

N, number

B

## Maternal transmissions

| Line | to male offspring |           |              |      |      |            |      |      |       | to female offspring |              |      |      |            |      |      |
|------|-------------------|-----------|--------------|------|------|------------|------|------|-------|---------------------|--------------|------|------|------------|------|------|
|      | Total             | Stable    | Contractions |      |      | Expansions |      |      | Total | Stable              | Contractions |      |      | Expansions |      |      |
|      | N                 | N (%)     | N (%)        | Max. | Mean | N (%)      | Max. | Mean | N     | N (%)               | N (%)        | Max. | Mean | N (%)      | Max. | Mean |
| Q80  | 59                | 26 (44.1) | 29 (44.1)    | 3    | 1.2  | 7 (11.9)   | 3    | 1.3  | 70    | 33 (47.1)           | 33 (47.1)    | 5    | 1.5  | 4 (5.7)    | 2    | 1.3  |
| Q92  | 104               | 41 (39.4) | 38 (36.5)    | 4    | 1.4  | 25 (24.0)  | 20   | 2.8  | 98    | 29 (30.2)           | 44 (45.8)    | 5    | 1.8  | 23 (24.0)  | 4    | 1.6  |

N, number

Table S1. Paternal and maternal transmission data for the different lines segregated by offspring sex in JAX's breeding data.

|                            |              | $\chi^2$ tests of independence<br>regarding offspring gender |    |         |
|----------------------------|--------------|--------------------------------------------------------------|----|---------|
| Line                       | Transmission | $\chi^2$                                                     | df | p-value |
| <i>Htt</i> <sup>Q50</sup>  | Paternal     | 2.493                                                        | 2  | 0.287   |
| <i>Htt</i> <sup>Q80</sup>  | Paternal     | 1.065                                                        | 2  | 0.587   |
|                            | Maternal     | 1.553                                                        | 2  | 0.460   |
| <i>Htt</i> <sup>Q92</sup>  | Paternal     | 3.574                                                        | 2  | 0.167   |
|                            | Maternal     | 2.263                                                        | 2  | 0.323   |
| <i>Htt</i> <sup>Q111</sup> | Paternal     | 0.062                                                        | 2  | 0.970   |
| <i>Htt</i> <sup>Q140</sup> | Paternal     | 3.555                                                        | 2  | 0.169   |
| <i>Htt</i> <sup>Q175</sup> | Paternal     | 3.532                                                        | 2  | 0.171   |

Table S2.  $\chi^2$  and p-values for offspring sex effect on the relative frequencies of contractions, expansions and stable alleles in the JAX *Htt* CAG knock-in dataset.

| Line                     | Paternal CAG |      |       | Transmissions |            |              |      |            |             |      |      |
|--------------------------|--------------|------|-------|---------------|------------|--------------|------|------------|-------------|------|------|
|                          |              |      |       | N             | Stable     | Contractions |      | Expansions |             |      |      |
|                          | Min.         | Max. | Mean  |               | N (%)      | N (%)        | Max. | Mean       | N (%)       | Max. | Mean |
| CD1 <sup>neo-</sup>      | 81           | 139  | 105.7 | 439           | 116 (26.4) | 51 (11.6)    | 8    | 1.7        | 272 (62.0)  | 12   | 1.8  |
| CD1 <sup>neo+</sup>      | 113          | 135  | 122.6 | 152           | 42 (27.6)  | 18 (11.8)    | 2    | 1.4        | 92 (60.5)   | 8    | 2.1  |
| adj CD1 <sup>neo-</sup>  | 114          | 134  | 121.5 | 170           | 35 (20.6)  | 14 (8.2)     | 6    | 1.6        | 121 (71.2)  | 12   | 2.1  |
| Q175 <sup>neo+</sup>     | 178          | 199  | 188.9 | 9172          | 592 (6.5)  | 927 (10.1)   | 128  | 5.1        | 7653 (83.4) | 153  | 5.2  |
| Q175 <sup>neo-</sup>     | 180          | 192  | 187.1 | 256           | 9 (3.5)    | 14 (5.5)     | 88   | 9.1        | 233 (91.0)  | 30   | 5.7  |
| adj Q175 <sup>neo+</sup> | 180          | 192  | 187.8 | 7541          | 473 (6.3)  | 706 (9.4)    | 128  | 5.4        | 6362 (84.4) | 153  | 5.2  |

**Table S3. Characteristics of paternal CAG intervals and transmission frequency and magnitude in the *neo+*, *neo-* and adjusted datasets.**
