# Supplementary material
Source: PubMed Central journal article supplement (PMC5289832)
Supplement: 503TableS1.pdf [file 503TableS1.pdf]

A

## Paternal transmissions

| Line | to male offspring |            |              |      |      |             |      |      | to female offspring |            |              |      |      |             |      |      |
|------|-------------------|------------|--------------|------|------|-------------|------|------|---------------------|------------|--------------|------|------|-------------|------|------|
|      | Total             | Stable     | Contractions |      |      | Expansions  |      |      | Total               | Stable     | Contractions |      |      | Expansions  |      |      |
|      | N                 | N (%)      | N (%)        | Max. | Mean | N (%)       | Max. | Mean | N                   | N (%)      | N (%)        | Max. | Mean | N (%)       | Max. | Mean |
| Q50  | 260               | 239 (91.9) | 13 (5.0)     | 2    | 1.2  | 8 (3.1)     | 1    | 1.0  | 251                 | 221 (88.0) | 16 (6.4)     | 2    | 1.1  | 14 (5.6)    | 1    | 1.0  |
| Q80  | 1184              | 430 (36.3) | 141 (13.6)   | 7    | 1.2  | 593 (50.1)  | 12   | 1.7  | 1281                | 491 (38.3) | 169 (13.2)   | 15   | 1.2  | 621 (48.5)  | 29   | 1.7  |
| Q92  | 1427              | 489 (34.3) | 147 (10.3)   | 5    | 1.2  | 791 (55.4)  | 23   | 1.9  | 1456                | 521 (35.8) | 121 (8.3)    | 12   | 1.4  | 814 (55.9)  | 50   | 1.9  |
| Q111 | 772               | 149 (19.3) | 125 (16.2)   | 19   | 2.1  | 498 (64.5)  | 14   | 2.2  | 778                 | 153 (19.7) | 123 (15.8)   | 28   | 1.9  | 502 (64.5)  | 9    | 2.3  |
| Q140 | 779               | 105 (13.5) | 81 (10.4)    | 18   | 2.4  | 593 (76.1)  | 23   | 3.2  | 779                 | 127 (16.3) | 91 (11.7)    | 10   | 1.9  | 561 (72.0)  | 65   | 3.2  |
| Q175 | 4719              | 309 (6.5)  | 450 (9.5)    | 103  | 5.1  | 3960 (83.9) | 104  | 5.2  | 4453                | 283 (6.4)  | 477 (10.7)   | 128  | 5.0  | 3693 (82.9) | 153  | 5.2  |

N, number

B

## Maternal transmissions

| Line | to male offspring |           |              |      |      |            |      |      | to female offspring |           |              |      |      |            |      |      |
|------|-------------------|-----------|--------------|------|------|------------|------|------|---------------------|-----------|--------------|------|------|------------|------|------|
|      | Total             | Stable    | Contractions |      |      | Expansions |      |      | Total               | Stable    | Contractions |      |      | Expansions |      |      |
|      | N                 | N (%)     | N (%)        | Max. | Mean | N (%)      | Max. | Mean | N                   | N (%)     | N (%)        | Max. | Mean | N (%)      | Max. | Mean |
| Q80  | 59                | 26 (44.1) | 29 (44.1)    | 3    | 1.2  | 7 (11.9)   | 3    | 1.3  | 70                  | 33 (47.1) | 33 (47.1)    | 5    | 1.5  | 4 (5.7)    | 2    | 1.3  |
| Q92  | 104               | 41 (39.4) | 38 (36.5)    | 4    | 1.4  | 25 (24.0)  | 20   | 2.8  | 98                  | 29 (30.2) | 44 (45.8)    | 5    | 1.8  | 23 (24.0)  | 4    | 1.6  |

N, number
