# Supplementary material
Source: PubMed Central journal article supplement (PMC5289832)
Supplement: 503TableS2.pdf [file 503TableS2.pdf]

$\chi^2$  tests of independence  
regarding offspring gender

| Line                       | Transmission | $\chi^2$ | df | p-value |
|----------------------------|--------------|----------|----|---------|
| <i>Htt</i> <sup>Q50</sup>  | Paternal     | 2.493    | 2  | 0.287   |
| <i>Htt</i> <sup>Q80</sup>  | Paternal     | 1.065    | 2  | 0.587   |
|                            | Maternal     | 1.553    | 2  | 0.460   |
| <i>Htt</i> <sup>Q92</sup>  | Paternal     | 3.574    | 2  | 0.167   |
|                            | Maternal     | 2.263    | 2  | 0.323   |
| <i>Htt</i> <sup>Q111</sup> | Paternal     | 0.062    | 2  | 0.970   |
| <i>Htt</i> <sup>Q140</sup> | Paternal     | 3.555    | 2  | 0.169   |
| <i>Htt</i> <sup>Q175</sup> | Paternal     | 3.532    | 2  | 0.171   |
