# Supplementary material
Source: PubMed Central journal article supplement (PMC5289832)
Supplement: 503TableS3.pdf [file 503TableS3.pdf]

| Line                                | Paternal CAG |      |       | Transmissions |            |              |      |            |             |      |      |
|-------------------------------------|--------------|------|-------|---------------|------------|--------------|------|------------|-------------|------|------|
|                                     |              |      |       | N             | Stable     | Contractions |      | Expansions |             |      |      |
|                                     | Min.         | Max. | Mean  |               | N (%)      | N (%)        | Max. | Mean       | N (%)       | Max. | Mean |
| CD1 <sup>neo-</sup>                 | 81           | 139  | 105.7 | 439           | 116 (26.4) | 51 (11.6)    | 8    | 1.7        | 272 (62.0)  | 12   | 1.8  |
| CD1 <sup>neo+</sup>                 | 113          | 135  | 122.6 | 152           | 42 (27.6)  | 18 (11.8)    | 2    | 1.4        | 92 (60.5)   | 8    | 2.1  |
| <sup>adj</sup> CD1 <sup>neo-</sup>  | 114          | 134  | 121.5 | 170           | 35 (20.6)  | 14 (8.2)     | 6    | 1.6        | 121 (71.2)  | 12   | 2.1  |
| Q175 <sup>neo+</sup>                | 178          | 199  | 188.9 | 9172          | 592 (6.5)  | 927 (10.1)   | 128  | 5.1        | 7653 (83.4) | 153  | 5.2  |
| Q175 <sup>neo-</sup>                | 180          | 192  | 187.1 | 256           | 9 (3.5)    | 14 (5.5)     | 88   | 9.1        | 233 (91.0)  | 30   | 5.7  |
| <sup>adj</sup> Q175 <sup>neo+</sup> | 180          | 192  | 187.8 | 7541          | 473 (6.3)  | 706 (9.4)    | 128  | 5.4        | 6362 (84.4) | 153  | 5.2  |
